# Supplementary material for: Water-induced stacking of α-Fe2O3 hexagonal nanoplates along the [001] direction and their facet-dependent catalytic performances
Source: Royal Society of Chemistry journal article supplement (doi:10.1039/d2ce00945e), 2022-01-01
Supplement: d2ce00945e1.pdf [file d2ce00945e1.pdf]

## Water-induced stacking $\alpha$ -Fe<sub>2</sub>O<sub>3</sub> hexagonal nanoplates along the [001] direction and its facet-dependent catalytic performances

Xiaobo Ren,<sup>a,c</sup> Huixiang Wang,<sup>\*a,b</sup> Liancheng Wang<sup>a</sup> and Baoliang Lv<sup>\*a,b</sup>

a. State Key Laboratory of Coal Conversion, Institute of Coal Chemistry, Chinese Academy of Sciences, Taiyuan 030001, China.

b. School of Chemistry and Materials Science, Shanxi Normal University, Taiyuan 030031, China.

c. University of Chinese Academy of Sciences, Beijing 100049, China.

E-mail: wanghx@sxicc.ac.cn, lbl604@sxicc.ac.cn

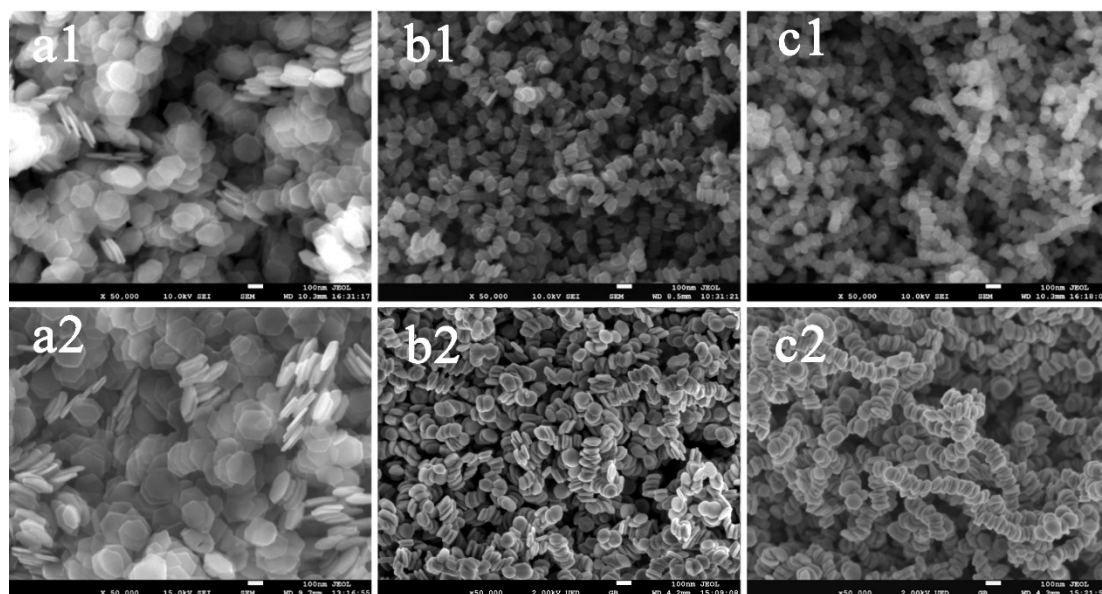

**Fig. S1** SEM images of  $\alpha$ -Fe<sub>2</sub>O<sub>3</sub> nanoparticles: (a1, a2)  $\alpha$ -Fe<sub>2</sub>O<sub>3</sub> HNP, (b1, b2)  $\alpha$ -Fe<sub>2</sub>O<sub>3</sub> SSHNP and (c1, c2)  $\alpha$ -Fe<sub>2</sub>O<sub>3</sub> LSHNP.

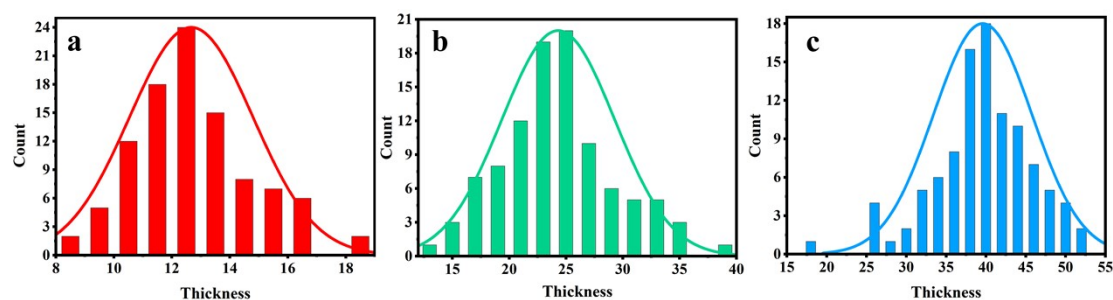

**Fig. S2** The statistical graph of HNP thickness for  $\alpha$ -Fe<sub>2</sub>O<sub>3</sub> (a) HNP, (b) SSHNP and (c) LSHNP.

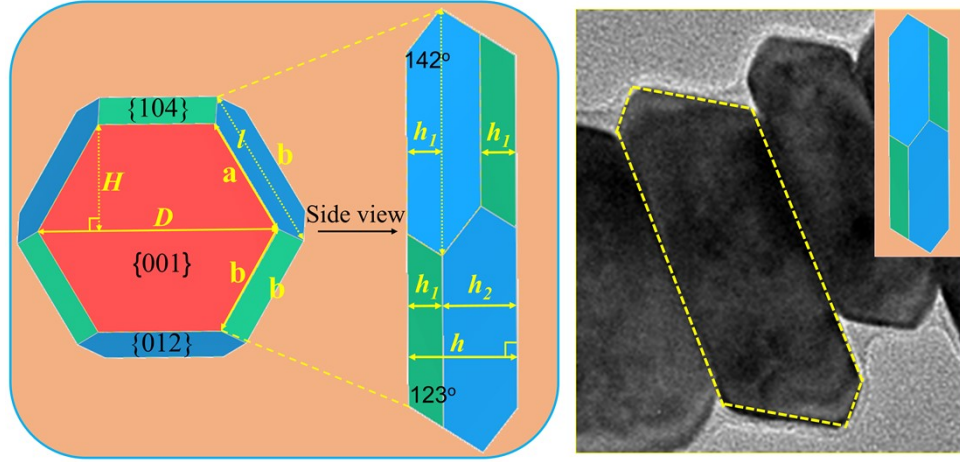

**Fig. S3** The ideal crystal model of HNP for  $\alpha\text{-Fe}_2\text{O}_3$ .

In fact, the thickness and diameter of nanoplate in the same sample are uneven, especially in SSHNP and LSHNP. Moreover, the stacked structures do not completely cover the  $\{001\}$  facets, therefore it is difficult to achieve an accurate quantification. Herein, we used an ideal model and average parameters to obtain the ratios of facets to reflect the increase trend of  $\{012\} + \{104\}$ , thus calculation method in this work is semi-quantitative, and the specific calculation process is as follows:

$$S_{001} = 2 \times \left[ \frac{1}{2} \times (a + D) \times H + \frac{1}{2} \times (b + D) \times H \right]$$

$$S_{104} = 6 \times b \times \frac{h_1}{\cos(142^\circ - 90^\circ)}$$

$$S_{012} = 6 \times \left[ \frac{1}{2} \times (a + l) \times \frac{h_1}{\cos(123^\circ - 90^\circ)} + \frac{1}{2} \times (b + l) \times \frac{h_2 - h_1}{\cos(123^\circ - 90^\circ)} \right]$$

$$l = \frac{\frac{h_1}{\tan(\theta)} + \frac{h_2 - h_1}{\tan(\theta)} + a \times \cos(\theta)}{\cos(\theta)}$$

Where  $D$  is the average diameter of hexagonal nanoplates;  $a$  and  $b$  are the side length of  $\{012\}$  and  $\{104\}$ , respectively;  $H$  is the height of trapezium section in hexagonal  $\{001\}$  plane;  $l$  is diagonal of  $\{012\}$  which links the two  $\{104\}$  facets;  $h$  is the thickness of nanoplate;  $h_1$  and  $h_2$  is the thickness of  $\{012\}$  and  $\{104\}$  in side view, respectively.  $\theta$  is the angle between  $a$  and the vertical normal line.

After measured we found that the side length of hexagon was nearly the same, so we made  $a$  equals to  $b$ , therefore we can conducted the conclusions as follows:

$$D = 2a; H = a \times \cos(30^\circ); h_1 = h_2 - h_1; h = 3h_1; \theta = 30^\circ$$

$$S_{001} = 3\sqrt{3}a^2$$

$$S_{104} = \frac{2ah}{\cos(52^\circ)}$$

$$S_{012} = \frac{2h(a+l)}{\cos(33^\circ)}$$

$$l = \frac{h}{3\tan(38^\circ)\cos(30^\circ)} + \frac{h}{3\tan(57^\circ)\cos(30^\circ)} + a$$

$$R_{HNP} = \frac{S_{012} + S_{104}}{S_{001}}$$

$$R_{SSHNP} = 6 \times \frac{S_{012} + S_{104}}{S_{001}}$$

$$R_{LSHNP} = 18 \times \frac{S_{012} + S_{104}}{S_{001}}$$

**Tab. S1** The side length and thickness statistics and facet ratios of three samples.

| Sample                                         | Side length<br>( <i>a</i> )<br>(nm) | Thickness<br>( <i>h</i> )<br>(nm) | Ratio of surface area<br>{012}+{104}/<br>{001} |
|------------------------------------------------|-------------------------------------|-----------------------------------|------------------------------------------------|
| $\alpha$ -Fe <sub>2</sub> O <sub>3</sub> HNP   | 65                                  | 12                                | 0.296                                          |
| $\alpha$ -Fe <sub>2</sub> O <sub>3</sub> SSHNP | 45                                  | 25                                | 5.775                                          |
| $\alpha$ -Fe <sub>2</sub> O <sub>3</sub> LSHNP | 35                                  | 40                                | 39.756                                         |

a and h are the average values of statistics.

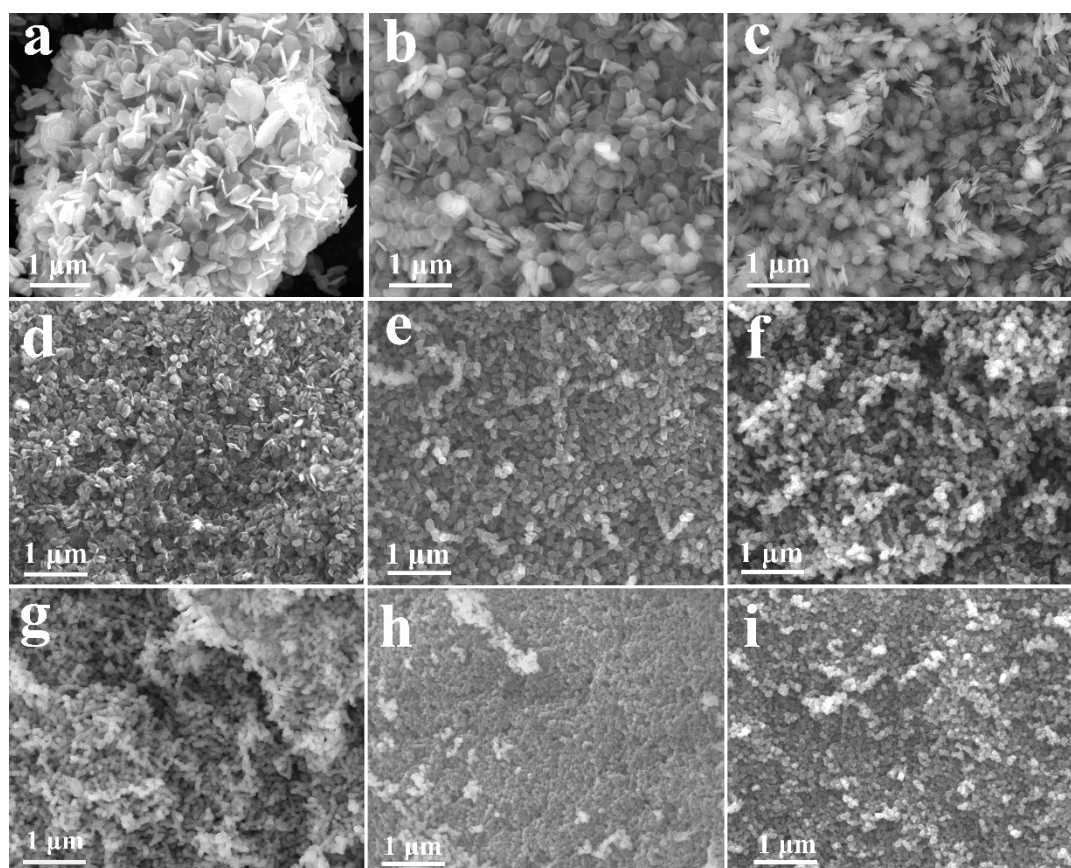

**Fig. S4** SEM images in low magnification of  $\alpha$ -Fe<sub>2</sub>O<sub>3</sub> nanoplates with different H<sub>2</sub>O content. (a) 0 mmol, (b) 28 mmol, (c) 56 mmol-HNP, (d) 111 mmol, (e) 222 mmol-SSHNP, (f) 333 mmol, (g) 444 mmol-LSHNP, (h) 555 mmol, (i) 666 mmol.

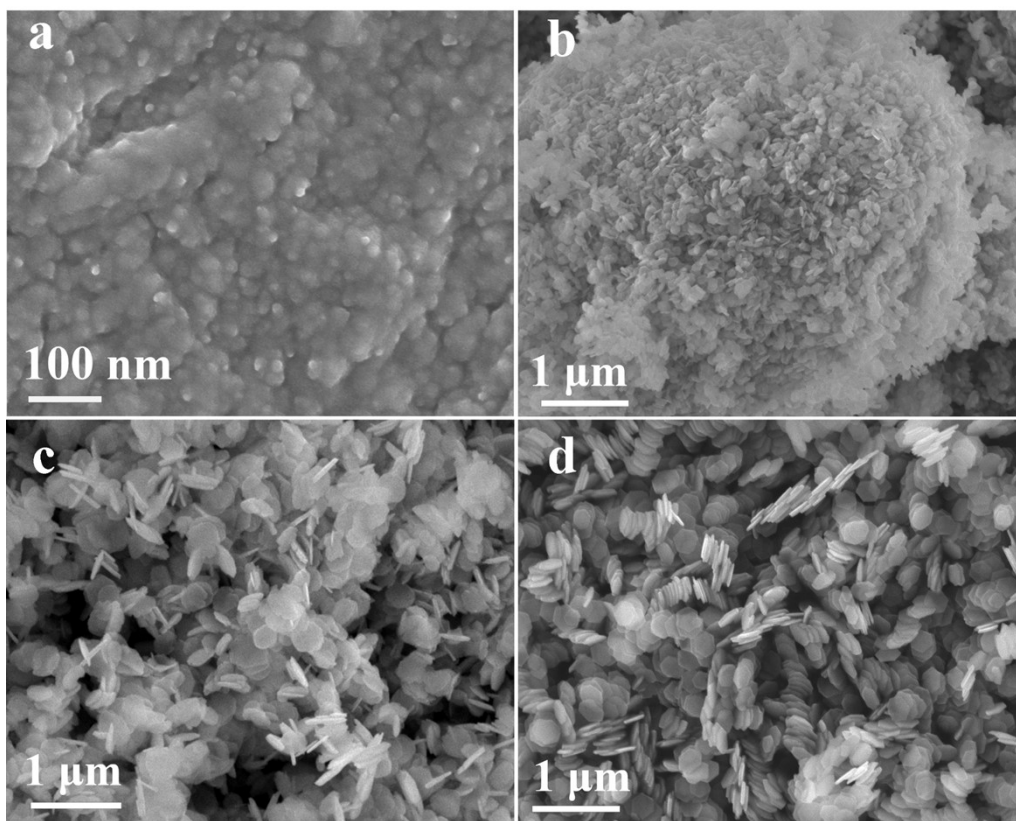

**Fig. S5** SEM images of  $\alpha$ -Fe<sub>2</sub>O<sub>3</sub> HNP obtained with 56 mmol H<sub>2</sub>O at reaction time: (a) 2 h, (b) 6 h, (c) 12 h, (d) 20 h.

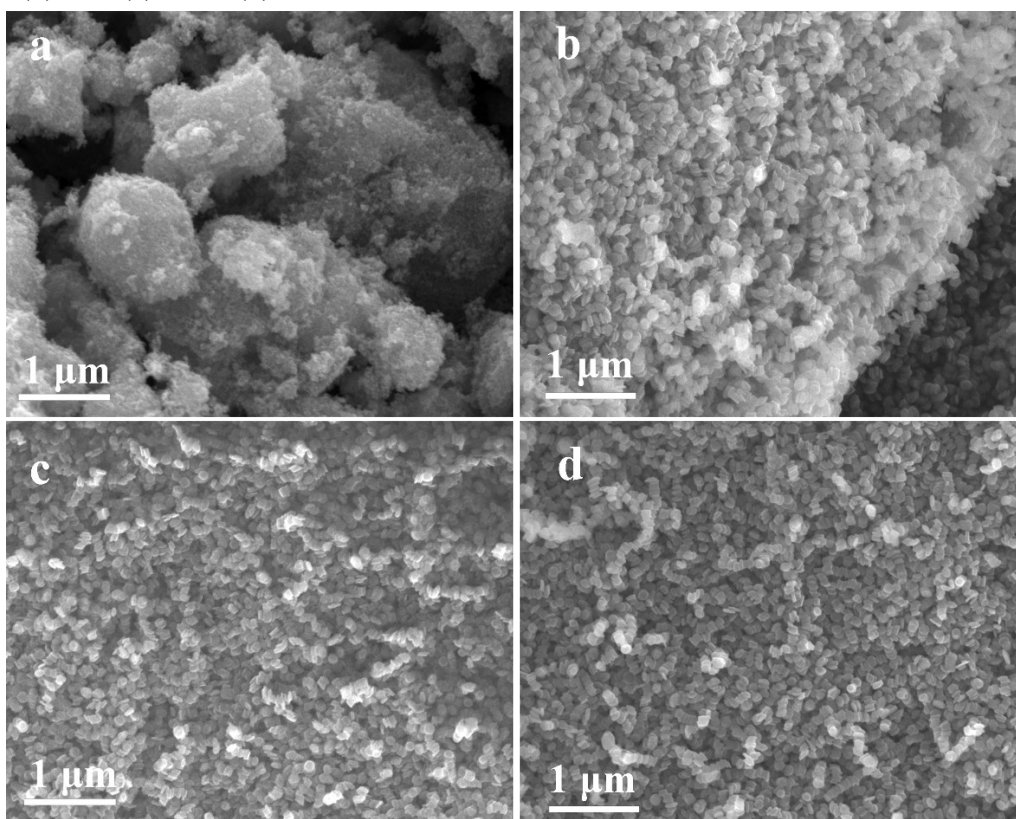

**Fig. S6** SEM images of  $\alpha$ -Fe<sub>2</sub>O<sub>3</sub> SSHNP obtained with 222 mmol H<sub>2</sub>O at reaction time (a) 3 h, (b) 6 h, (c) 12 h, (d) 21 h

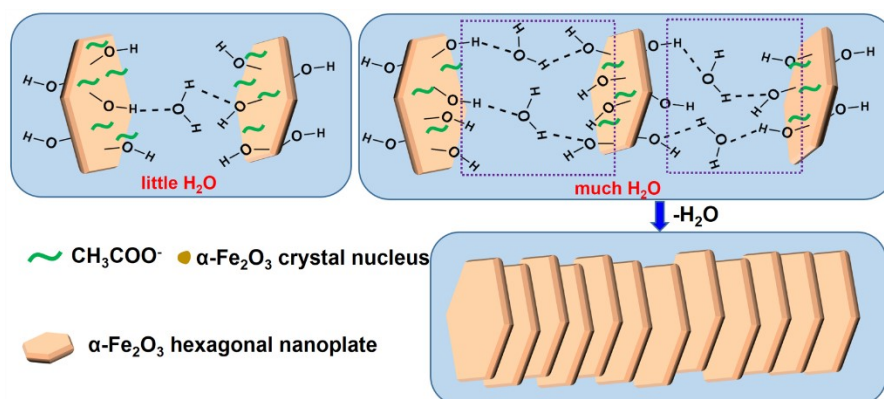

**Fig. S7** Schematic diagram of hydrogen bond and dehydration process between  $\alpha\text{-Fe}_2\text{O}_3$  {001} facets.
